# Supplementary material
Source: PubMed Central journal article supplement (PMC5556700)
Supplement: NIHMS890480-supplement-supplement_1.pdf [file NIHMS890480-supplement-supplement_1.pdf]

S1 (Table) | Human CCCH-Zinc Finger Proteins

| Gene name | Description or other name                            | Biological Functions          | References |
|-----------|------------------------------------------------------|-------------------------------|------------|
| CNOT4     | CCR4-NOT complex, subunit 4                          | Megakaryocyte differentiation | 1, 2       |
| CPSF4     | Cleavage and polyadenylation specific factor 4       | Antivirus                     | 3          |
| CPSF4L    | Cleavage and polyadnylation specific factor 4 like   | Unknown                       |            |
| DHX57     | Death box protein 57                                 | Unknown                       |            |
| DUS3L     | Dihydrouridine synthase 3-like                       | Unknown                       |            |
| HELZ      | Helicase with zinc finger domain                     | Unknown                       |            |
| HELZ2     | Helicase with zinc finger domain 2                   | Adipocyte differentiation     | 4          |
| LENG9     | Leukocyte receptor cluster member 9                  | Unknown                       |            |
| MBNL1     | Muscleblind like 1                                   | Myoblast differentiation      | 5          |
| MBNL2     | Muscleblind like 2                                   | Myoblast differentiation      | 6          |
| MBNL3     | Muscleblind like 3                                   | Myoblast differentiation      | 7          |
| MKRN1     | Makorin ring finger protein 1                        | Tumourigenesis                | 8          |
| MKRN2     | Makorin ring finger protein 2                        | Neurogenesis                  | 9          |
| MKRN3     | Makorin ring finger protein 3                        | Central precocious puberty    | 10         |
| NUPL2     | Nucleoporin like 2                                   | Unknown                       |            |
| PAN3      | Pab1p-dependent poly(A) nuclease 3                   | Unknown                       |            |
| PPP1R10   | Protein phosphatase1 regulatory subunit 10           | Inhibition of HIV replication | 11         |
| PRR3      | Proline rich protein 3                               | Unknown                       |            |
| RC3H1     | Roquin-1                                             | Immune homeostasis            | 12, 13     |
| RC3H2     | Roquin-2                                             | Immune homeostasis            | 14         |
| RNF113A   | Ring finger protein 113A                             | Unknown                       |            |
| RNF113B   | Ring finger protein 113B                             | Unknown                       |            |
| TIPARP    | TCDD-inducible poly(ADP-ribose) polymerase           | Antivirus                     | 15         |
| TOE1      | Target of Egr-1                                      | Inhibition of HIV replication | 16         |
| TRMT1     | TRM1 tRNA methyltransferase 1                        | Unknown                       |            |
| U2AF1     | U2 small nuclear RNP auxiliary factor, 35 kd subunit | Blood cell differentiation    | 17         |
| U2AF1L4   | U2 small nuclear RNP auxiliary factor 1-like 4       | T cell activation             | 18         |
| ZC3HAV1L  | Zinc finger CCCH-type, antiviral 1-like              | Unknown                       |            |
| ZC3H1     | Poly(ADP-ribose) polymerase 12                       | Inflammation, antivirus       | 19, 20     |
| ZC3H2     | Zinc finger CCCH-type antiviral 1                    | Antivirus                     | 21, 22     |
| ZC3H3     | Smad-interacting CPSF-like factor                    | Unknown                       |            |
| ZC3H4     | Zinc finger CCCH containing 4                        | Unknown                       |            |
| ZC3H5     | Unkempt homologue                                    | Neuronal differentiation      | 23         |
| ZC3H5L    | Unkempt-like                                         | Unknown                       |            |
| ZC3H6     | Zinc finger CCCH containing 6                        | Unknown                       |            |
| ZC3H7A    | Zinc finger CCCH containing 7A                       | Unknown                       |            |
| ZC3H7B    | Zinc finger CCCH containing 7B                       | Unknown                       |            |
| ZC3H8     | Fetal liver zinc finger protein 1                    | Thymocyte homeostasis         | 24         |
| ZC3H9     | Zinc finger and G-patch domain-containing protein    | Tumor suppressor              | 25         |
| ZC3H10    | Zinc finger CCCH containing 10                       | Putative tumor suppressor     | 26         |
| ZC3H11A   | Zinc finger CCCH containing 11A                      | Unknown                       |            |
| ZC3H12A   | MCP-induced protein 1 (MCPIP1), Regnase-1            | Inflammation and immunity     | 27, 28, 29 |
| ZC3H12B   | MCP-induced protein 2 (MCPIP2)                       | Unknown                       |            |
| ZC3H12C   | MCP-induced protein 3 (MCPIP3)                       | Inflammation                  | 30         |
| ZC3H12D   | MCP-induced protein 4 (MCPIP4)                       | Inflammation and immunity     | 31, 32     |
| ZC3H13    | Zinc finger CCCH containing 13                       | Inflammation                  | 33         |
| ZC3H14    | Nab2 homologue                                       | Neuron differentiation        | 34         |
| ZC3H15    | Immediate early response erythropoietin 4 (LEREPO4)  | HIV replication               | 35         |
| ZC3H16    | RNA binding motif protein 22 (RBM22)                 | Unknown                       |            |
| ZC3H17    | RNA binding motif protein 26 (RBM26)                 | Unknown                       |            |
| ZC3H18    | Conserved nuclear protein Nhn1                       | Inflammation                  | 33         |
| ZC3H19    | Zinc finger, Matrin type 5 (ZMAT5)                   | Unknown                       |            |
| ZC3H20    | RNA binding motif protein 27 (RBM27)                 | Unknown                       |            |
| ZC3H22    | U2AF1-related sequence 2 (ZRSR2)                     | Blood cell differentiation    | 36         |
| ZFP36     | Tristetraprolin (TTP), TIS11                         | Inflammation and immunity     | 37, 38     |
| ZFP36L1   | Zinc finger protein 36-like 1, TIS11B                | Immune cell maturation        | 39         |
| ZFP36L2   | Zinc finger protein 36-like 2, TIS11D                | Immune cell maturation        | 39         |

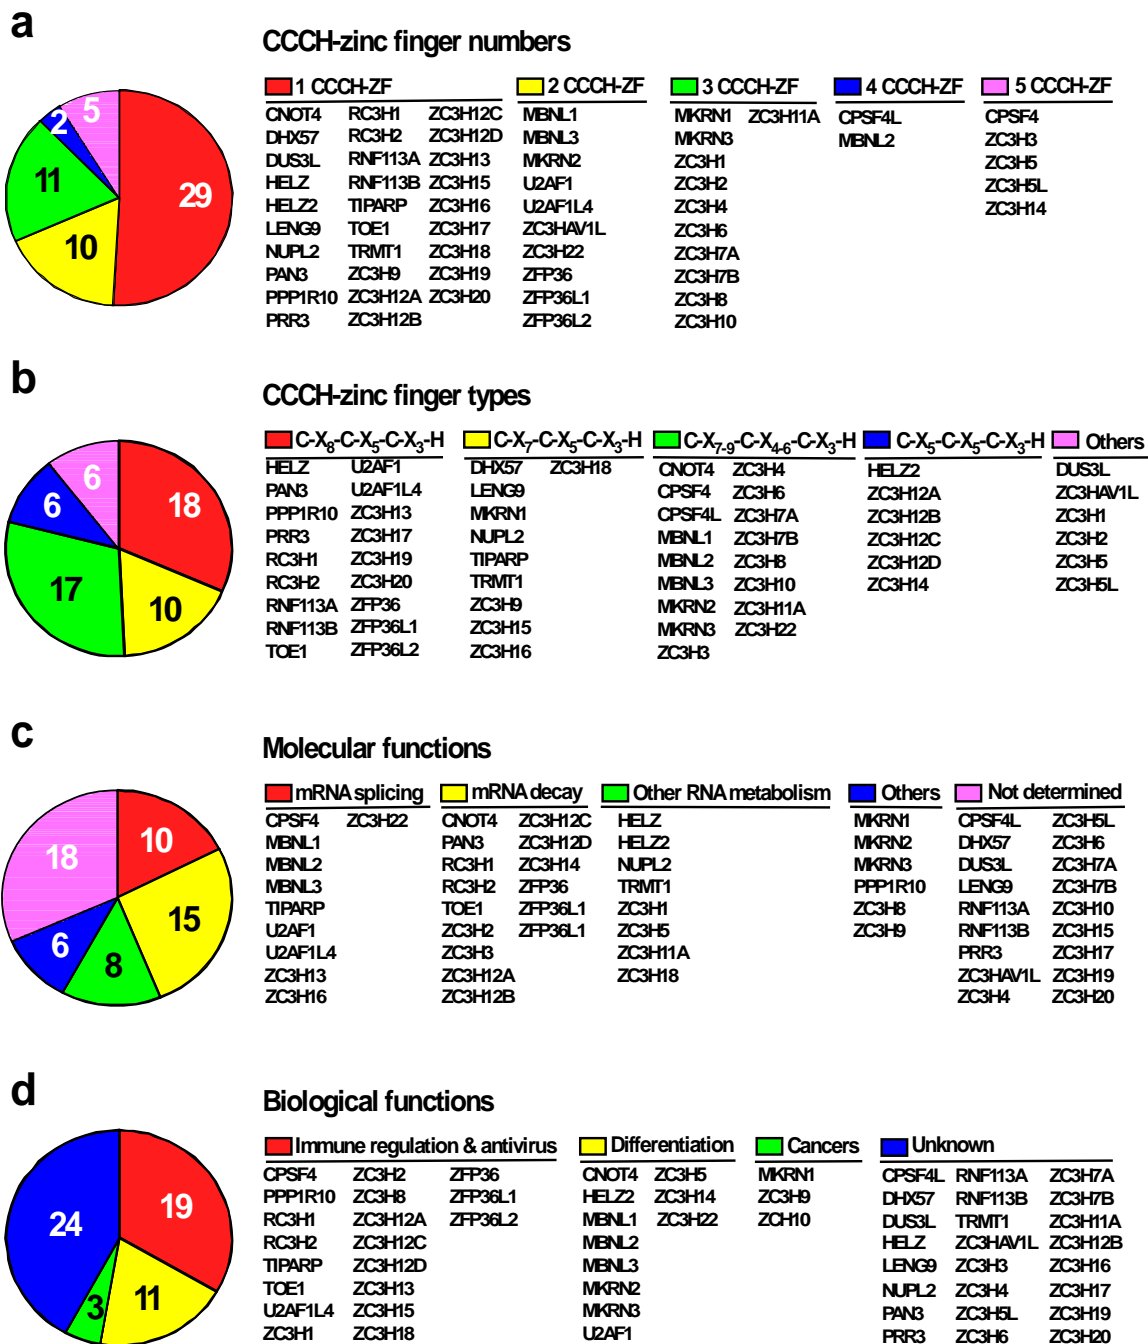

**S2 | Categories of human CCCH-zinc finger proteins. a** | Categories of CCCH-zinc finger proteins divided by CCCH-zinc finger numbers. Most of proteins contain 1-3 CCCH-zinc fingers (49 among 57), a few of proteins contain 4-5 CCCH-zinc fingers (7 among 57). It is to note that several human proteins such as ZC3H5 contain different numbers of CCCH-zinc fingers with their mouse counterparts. **b** | Categories of CCCH-zinc finger proteins divided by CCCH-zinc finger types. Most of CCCH-zinc finger proteins contains C-X7-9-C-X4-6-C-X3-H class zinc fingers (45 among 57), Several proteins including ZC3H12 family, ZC3H14 and HELZ2 containing a single C-X5-C-X5-C-X3-H type zinc finger. **c** | Categories of CCCH-zinc finger proteins divided by molecular function. Most of CCCH-zinc finger proteins involved in the regulation of RNA metabolism including RNA splicing, polyadenylation, export, translation and decay (33 among 57). Others act as transcriptional repressors or signal transducers. The molecular functions of 18 CCCH-zinc finger proteins are not yet determined. **d** | Categories of CCCH-zinc finger proteins divided by biological function. Though the biological functions of 24 CCCH-zinc proteins are not characterized, the other proteins are crucial in the regulation of immune response, cell differentiation and cancer cell growth.

### **S3 BOX. Antiviral function of CCCH zinc finger proteins**

Several CCCH-zinc finger proteins exert antiviral functions, with mechanisms including degradation of viral RNA, repression of viral RNA translation, and enhancing antiviral signaling. For example, ZAP, also known as PARP13, ZC3H2 or ZC3HAV1, is a broad-spectrum antiviral protein that targets different viral families such as retroviruses, alpha viruses, filoviruses, and hepadna viruses<sup>1</sup>. ZAP targets specific viral RNAs for decay and translational repression by recruiting destabilizing factors and other effector proteins<sup>2, 3</sup>. Interestingly, ZAPS, a short splicing isoform of ZAP without a PARP domain, functions as a potent stimulator of interferon responses in human cells, mediated by the RNA helicase RIG-I. ZAPS was shown to associate with RIG-1 and promote the oligomerization and ATPase activity of RIG-I, which led to robust activation of IRF3 and the NF- $\kappa$ B transcription factor. Disruption of the gene encoding ZAPS resulted in impaired induction of IFN $\alpha$ , IFN $\beta$  and other cytokines after viral infection. These results indicate that ZAPS is a key regulator of RIG-I signaling during the innate antiviral immune response<sup>4</sup>. Two other PARP-containing proteins, PARP12 and TIPARP, also belong to the CCCH-zinc finger protein superfamily and are essential for an effective antiviral innate immune response<sup>5, 6</sup>.

Besides critically regulating innate and adaptive immune responses, MCPIP1 also exhibits broad-spectrum antiviral effects through viral RNA binding and degradation. MCPIP1 can target viruses from several different families, including JEV, DEN-2, HIV and HCV<sup>7-9</sup>. Interestingly, TTP has also been shown to inhibit HIV-1 production by binding to viral genomic RNA and promoting its decay<sup>10</sup>. TOE1 (target of Egr-1), also a CCCH-zinc finger protein, displays deadenylase activity in cultured cells and is involved in mRNA splicing. Interestingly, a recent study revealed that TOE1 can be secreted from activated CD8<sup>+</sup> T cells and enter CD4<sup>+</sup> T cells, where it can inhibit HIV-1 replication by binding to TAR sequences and repressing its transcription<sup>11</sup>.

1. Todorova, T., Bock, F.J., Chang, P. Poly(ADP-ribose) polymerase-13 and RNA regulation in immunity and cancer. *Trends Mol. Med.* **21**, 373-384 (2015).
2. Guo, X., Ma, J., Sun, J., Gao, G. The zinc-finger antiviral protein recruits the RNA processing exosome to degrade the target mRNA. *Proc. Natl. Acad. Sci. USA.* **104**, 151-156 (2007).
3. Zhu, Y., Wang, X., Goff, S.P., Gao, G. Translational repression precedes and is required for ZAP-mediated mRNA decay. *EMBO J.* **31**, 4236-4246 (2012).
4. Hayakawa, S. et al. ZAPS is a potent stimulator of signaling mediated by the RNA helicase RIG-I during antiviral responses. *Nat. Immunol.* **12**, 37-44 (2011).
5. Atasheva, S., Frolova, E.I., Frolov, I. Interferon-stimulated poly(ADP-Ribose) polymerases are potent inhibitors of cellular translation and virus replication. *J. Virol.* **88**, 2116-2130 (2014).
6. Welsby, I. et al. PARP12, an interferon-stimulated gene involved in the control of protein translation and inflammation. *J. Biol. Chem.* **289**, 26642-26657 (2014).
7. Lin, R.J. et al. MCPIP1 ribonuclease exhibits broad-spectrum antiviral effects through viral RNA binding and degradation. *Nucleic Acids Res.* **41**, 3314-3326 (2013).
8. Liu, S. et al. MCPIP1 restricts HIV infection and is rapidly degraded in activated CD4+ T cells. *Proc. Natl. Acad. Sci. USA.* **110**, 19083-19088 (2013).
9. Lin, R.J. et al. MCPIP1 suppresses hepatitis C virus replication and negatively regulates virus-induced proinflammatory cytokine responses. *J. Immunol.* **193**, 4159-4168 (2014).
10. Maeda M, et al. Tristetraprolin inhibits HIV-1 production by binding to genomic RNA. *Microbes Infect.* **8**, 2647-2656 (2006).
11. Sperandio, S. et al. TOE1 is an inhibitor of HIV-1 replication with cell-penetrating capability. *Proc. Natl. Acad. Sci. USA.* **112**, E3392-3401 (2015).

**References for S1**

1. Albert, T.K., *et al.* Identification of a ubiquitin-protein ligase subunit within the CCR4-NOT transcription repressor complex. *EMBO J.* **21**, 355-364 (2002).
2. Zhang, L., *et al.* Cross-talk between PRMT1-mediated methylation and ubiquitylation on RBM15 controls RNA splicing. *Elife.* **4** (2015).
3. Twu, K.Y., Noah, D.L., Rao, P., Kuo, R.L., Krug, R.M. The CPSF30 binding site on the NS1A protein of influenza A virus is a potential antiviral target. *J. Virol.* **80**:3957-3965 (2006).
4. Katano-Toki, A., *et al.* THRAP3 interacts with HELZ2 and plays a novel role in adipocyte differentiation. *Mol. Endocrinol.* **27**:769-780 (2013).
5. Kanadia, R.N., *et al.* A muscleblind knockout model for myotonic dystrophy. *Science.* **302**:1978-1980 (2003).
6. Hao, M., *et al.* Muscleblind-like 2 (Mbnl2) -deficient mice as a model for myotonic dystrophy. *Dev. Dyn.* **237**:403-410 (2008).
7. Lee, K.S., *et al.* RNA-binding protein Muscleblind-like 3 (MBNL3) disrupts myocyte enhancer factor 2 (Mef2) {beta}-exon splicing. *J. Biol. Chem.* **285**:33779-33787 (2010).
8. Lee, E.W., *et al.* Differential regulation of p53 and p21 by MKRN1 E3 ligase controls cell cycle arrest and apoptosis. *EMBO J.* **28**:2100-2113 (2009).
9. Yang, P.H., *et al.* Makorin-2 is a neurogenesis inhibitor downstream of phosphatidylinositol 3-kinase/Akt (PI3K/Akt) signal. *J Biol Chem.* **283**:8486-8495 (2008).
10. Abreu, A.P., *et al.* Central precocious puberty caused by mutations in the imprinted gene MKRN3. *N. Engl. J. Med.* **368**:2467-2475 (2013).
11. Kapoor, R., *et al.* The miRNA miR-34a enhances HIV-1 replication by targeting PNUTS/PPP1R10, which negatively regulates HIV-1 transcriptional complex formation. *Biochem. J.* **470**:293-302 (2015).
12. Vinuesa, C.G. *et al.* A RING-type ubiquitin ligase family member required to repress follicular helper T cells and autoimmunity. *Nature.* **435**, 452-458 (2005).
13. Yu, D. *et al.* Roquin represses autoimmunity by limiting inducible T-cell co-stimulator messenger RNA. *Nature.* **450**, 299-303 (2007).
14. Pratama, A. *et al.* Roquin-2 shares functions with its paralog Roquin-1 in the repression of mRNAs controlling T follicular helper cells and systemic inflammation. *Immunity.* **38**, 669-680 (2013).
15. Atasheva, S., Frolova, E.I., Frolov, I. Interferon-stimulated poly(ADP-Ribose) polymerases are potent inhibitors of cellular translation and virus replication. *J. Virol.* **88**(4):2116-2130 (2014).
16. Sperandio, S. *et al.* TOE1 is an inhibitor of HIV-1 replication with cell-penetrating capability. *Proc. Natl. Acad. Sci. USA.* **112**, E3392-3401 (2015).
17. Yoshida, K., *et al.* Frequent pathway mutations of splicing machinery in myelodysplasia. *Nature.* **478**:64-69 (2011).
18. Heyd, F., ten Dam, G., Möröy, T. Auxiliary splice factor U2AF26 and transcription factor Gfi1 cooperate directly in regulating CD45 alternative splicing. *Nat. Immunol.* **7**, 859-867 (2006).
19. Atasheva, S., Frolova, E.I., Frolov, I. Interferon-stimulated poly(ADP-Ribose) polymerases are potent inhibitors of cellular translation and virus replication. *J. Virol.* **88**, 2116-2130 (2014).
20. Welsby, I. *et al.* PARP12, an interferon-stimulated gene involved in the control of protein translation and inflammation. *J. Biol. Chem.* **289**, 26642-26657 (2014).

21. Guo, X., Ma, J., Sun, J., Gao, G. The zinc-finger antiviral protein recruits the RNA processing exosome to degrade the target mRNA. *Proc. Natl. Acad. Sci. USA.* **104**, 151-156 (2007).
22. Zhu, Y., Wang, X., Goff, S.P., Gao, G. Translational repression precedes and is required for ZAP-mediated mRNA decay. *EMBO J.* **31**, 4236-4246 (2012).
23. Avet-Rochex, A., *et al.* Unkempt is negatively regulated by mTOR and uncouples neuronal differentiation from growth control. *PLoS Genet.* **10**:e1004624 (2014).
24. Hwang, E.S., Ho, I.C. Regulation of thymocyte homeostasis by Fliz1. *Immunology.* **106**, 464-469 (2002).
25. Ordway, J.M., *et al.* Comprehensive DNA methylation profiling in a human cancer genome identifies novel epigenetic targets. *Carcinogenesis.* **27**:2409-2423 (2006).
26. Guardiola-Serrano, F., *et al.* Gene trapping identifies a putative tumor suppressor and a new inducer of cell migration. *Biochem. Biophys. Res. Commun.* **376**:748-752 (2008).
27. Liang, J. *et al.* A novel CCCH-zinc finger protein family regulates proinflammatory activation of macrophages. *J. Biol. Chem.* **283**, 6337-6346 (2008).
28. Matsushita, K. *et al.* Zc3h12a is an RNase essential for controlling immune responses by regulating mRNA decay. *Nature.* **458**, 1185-1190 (2009).
29. Liu, S. *et al.* MCPIP1 restricts HIV infection and is rapidly degraded in activated CD4+ T cells. *Proc Natl Acad Sci U S A.* **110**, 19083-19088 (2013).
30. Liu, L., *et al.* Zc3h12c inhibits vascular inflammation by repressing NF- $\kappa$ B activation and pro-inflammatory gene expression in endothelial cells. *Biochem. J.* **451**:55-60 (2013).
31. Zhang, H. *et al.* ZC3H12D attenuated inflammation responses by reducing mRNA stability of proinflammatory genes. *Mol Immunol.* **67**, 206-212 (2015).
32. Minagawa, K. *et al.* Posttranscriptional modulation of cytokine production in T cells for the regulation of excessive inflammation by TFL. *J. Immunol.* **192**, 1512-1524 (2014).
33. Gewurz, B.E., *et al.* Genome-wide siRNA screen for mediators of NF- $\kappa$ B activation. *Proc. Natl. Acad. Sci. USA.* **109**:2467-2472 (2012).
34. Pak, C., *et al.* Mutation of the conserved polyadenosine RNA binding protein, ZC3H14/dNab2, impairs neural function in Drosophila and humans. *Proc. Natl. Acad. Sci. USA.* **108**:12390-12395 (2011).
35. Capalbo, G., *et al.* Inhibition of X4-tropic HIV type 1 replication by knockdown of the cellular protein LEREPO4. *AIDS Res. Hum. Retroviruses.* **26**:1155-1161 (2010).
36. Thol, F., *et al.* Frequency and prognostic impact of mutations in SRSF2, U2AF1, and ZRSR2 in patients with myelodysplastic syndromes. *Blood.* **119**:3578-3584 (2012).
37. Carballo, E., Lai, W.S., Blackshear, P.J. Feedback inhibition of macrophage tumor necrosis factor- $\alpha$  production by tristetraprolin. *Science.* **281**, 1001-1005 (1998).
38. Taylor, G.A. *et al.* A pathogenetic role for TNF  $\alpha$  in the syndrome of cachexia, arthritis, and autoimmunity resulting from tristetraprolin (TTP) deficiency. *Immunity.* **4**, 445-454 (1996).
39. Hodson, D.J. *et al.* Deletion of the RNA-binding proteins ZFP36L1 and ZFP36L2 leads to perturbed thymic development and T lymphoblastic leukemia. *Nat. Immunol.* **11**, 717-724 (2010).
